# Supplementary material for: Indocyanine green-platinum porphyrins integrated conjugated polymer hybrid nanoparticles for near-infrared-triggered photothermal and two-photon photodynamic therapy
Source: Royal Society of Chemistry journal article supplement (doi:10.1039/c6tb03215j), 2017-01-01
Supplement: c6tb03215j1.pdf [file c6tb03215j1.pdf]

Supplementary Material

**Indocyanine green-platinum porphyrins integrated conjugated  
polymer hybrid nanoparticles for near-infrared-triggered  
photothermal and two-photon photodynamic therapy**

Xiao-Hui Wang<sup>a,\*</sup>, Hong-Shang Peng<sup>b</sup>, Wei Yang<sup>a</sup>, Zhao-Di Ren<sup>a</sup>, Xiao-Ming Liu<sup>a</sup>, and Yuan-An Liu<sup>a,\*</sup>

<sup>a</sup> Beijing Key Laboratory of Work Safety Intelligent Monitoring, School of Electronic Engineering, Beijing University of Posts and Telecommunications, Haidian District, Beijing, 100876, China,  
Email: wangxiaohui@bupt.edu.cn

<sup>b</sup> School of Science, Minzu University of China, Beijing, 100081, China

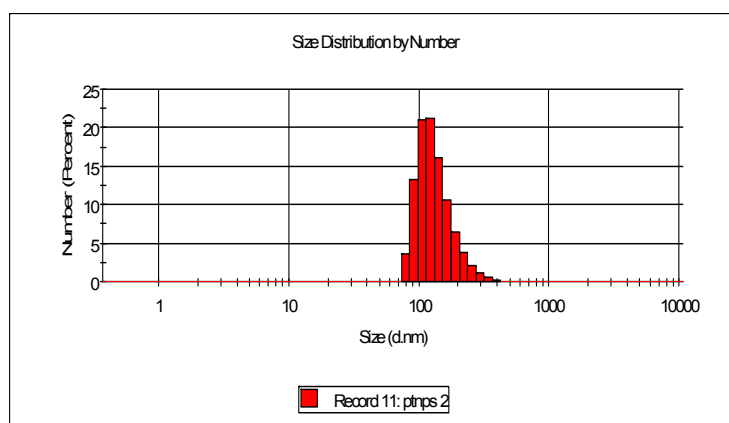

Fig. S1 Histogram of hydrodynamic diameter data measured by dynamic light scattering.

(a)

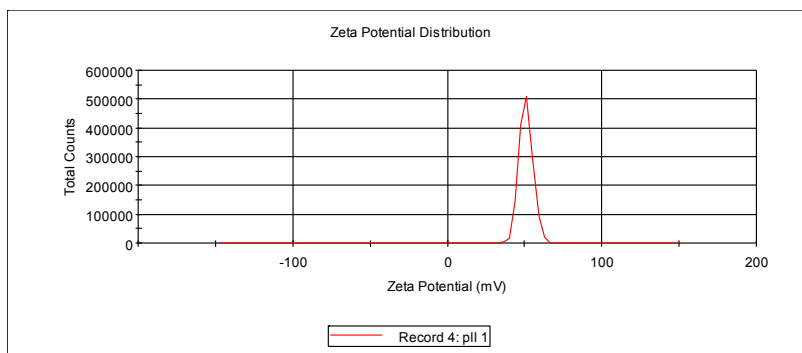

(b)

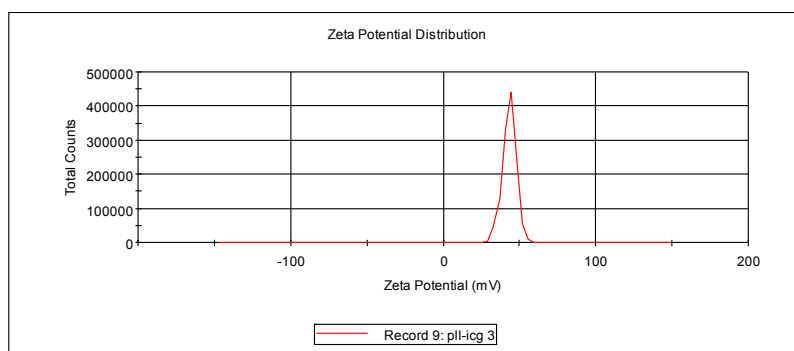

Fig. S2 Zeta potential of Pt-NPs before (a) and after ICG loading (b).

(a)

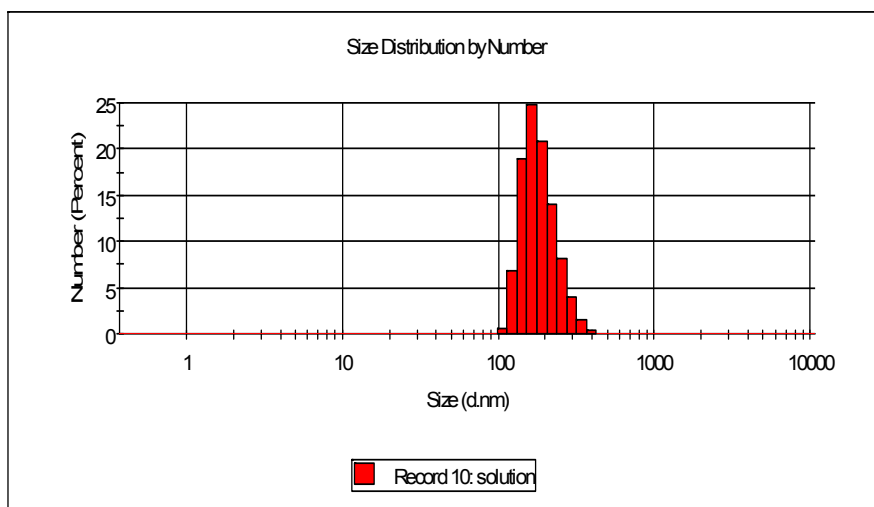

(b)

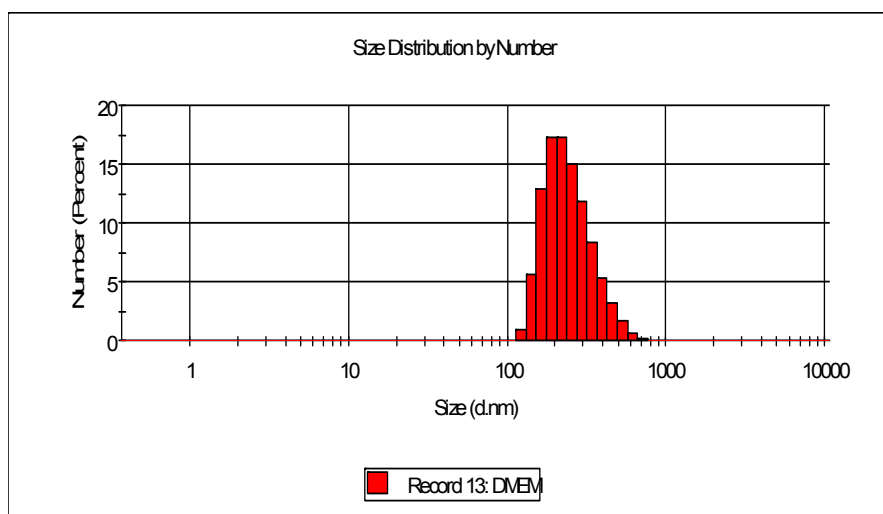

Fig. S3 Stability of ICG-Pt-NPs dispersed in solution (a) and DMEM (b) supplemented with 10% FBS at 7 days (b) recorded by DLS.

(a)

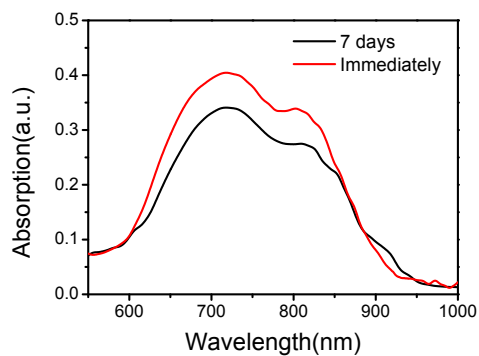

(b)

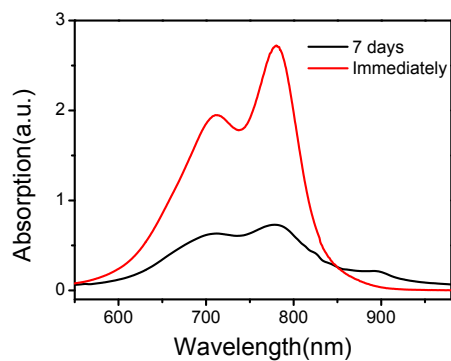

Fig. S4 Absorption spectra of ICG loaded NPs (a) and free ICG (b) from immediately dissolved in water to 7 days.

(a)

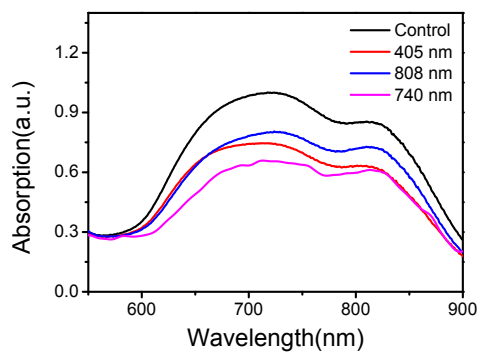

(b)

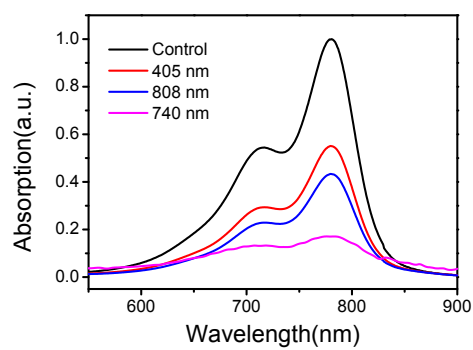

Fig. S5 Stability of ICG-Pt-NPs (a) and free ICG (b) under 405 nm ( $0.06 \text{ W}\cdot\text{cm}^{-2}$  for 3 min), 808 nm ( $1 \text{ W}\cdot\text{cm}^{-2}$  for 10 min) and 740 nm ( $3 \text{ W}\cdot\text{cm}^{-2}$  for 10 min) laser irradiation, respectively.

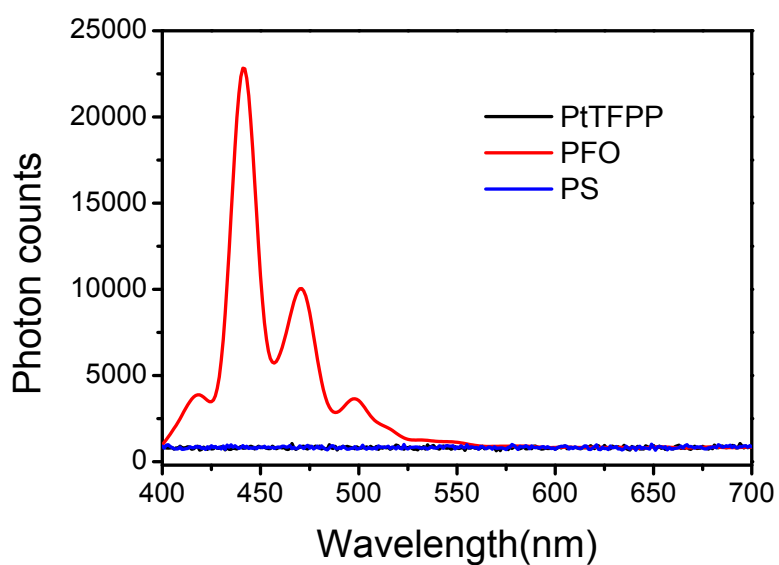

Fig. S6 Two-photon excitation emission of PtTFPP, PFO and PS in tetrahydrofuran under irradiation with femto-second laser pulses at 740 nm.

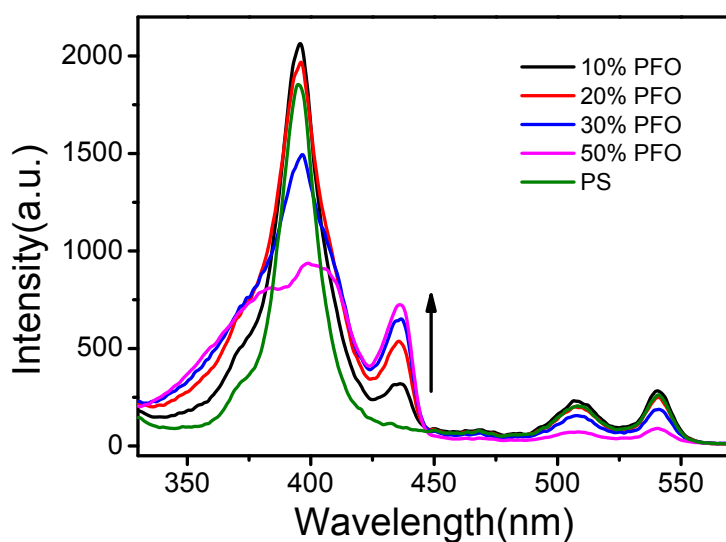

Fig. S7 Luminescence excitation spectra of various PtTFPP-doped nanoparticles at different concentration of PFO in the nanoparticles (0%, 10%, 20%, 30% and 50% weight ratio of [PFO] / [total]).  $\lambda_{em} = 650$  nm.

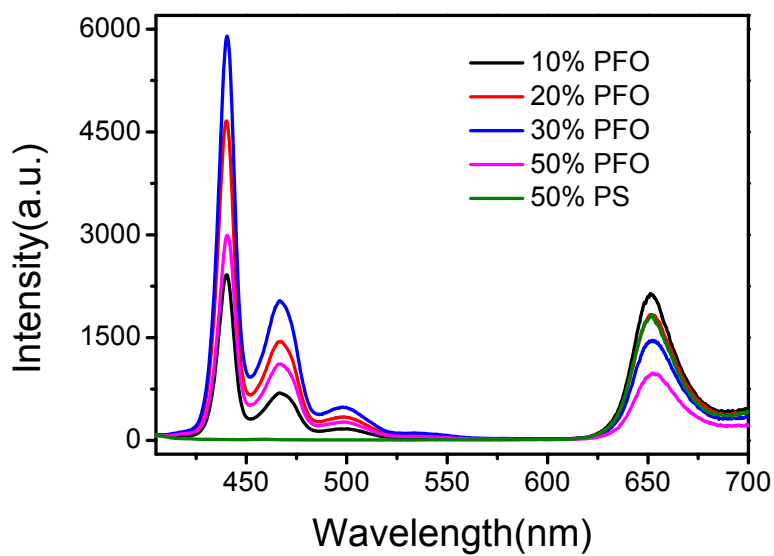

Fig. S8 Luminescence emission spectra of various nanoparticles (0%, 15%, 30% and 50% weight ratio of [PFO] / [total]).  $\lambda_{ex} = 395$  nm.

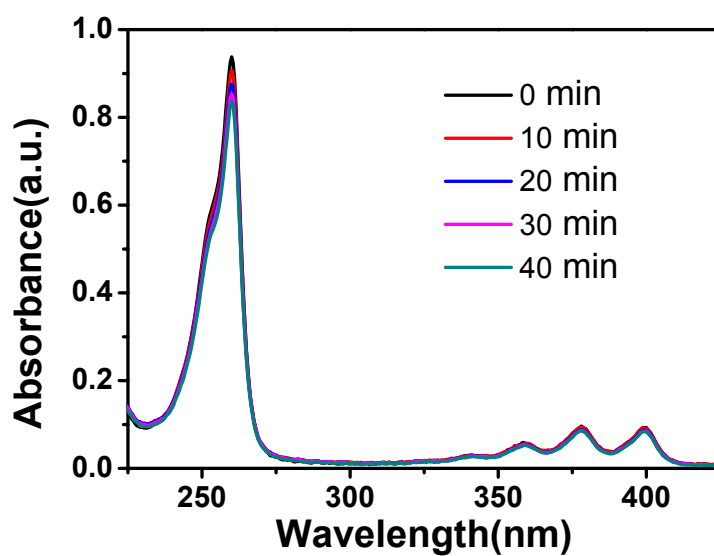

Fig. S9 Absorption spectra of ADMA ( $50 \mu\text{M}$ ) in 10 mM PBS buffer solution under irradiation at 540 nm for various time (0 ~ 40 min).

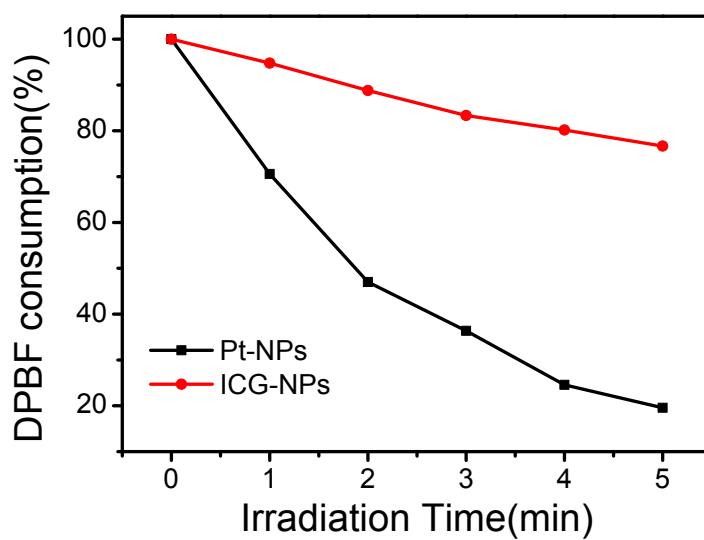

Fig. S10 Comparison of consumption rate of DPBF (10 ppm) over time between ICG-NPs (20 mg·L<sup>-1</sup>) and Pt-NPs (20 mg·L<sup>-1</sup>).

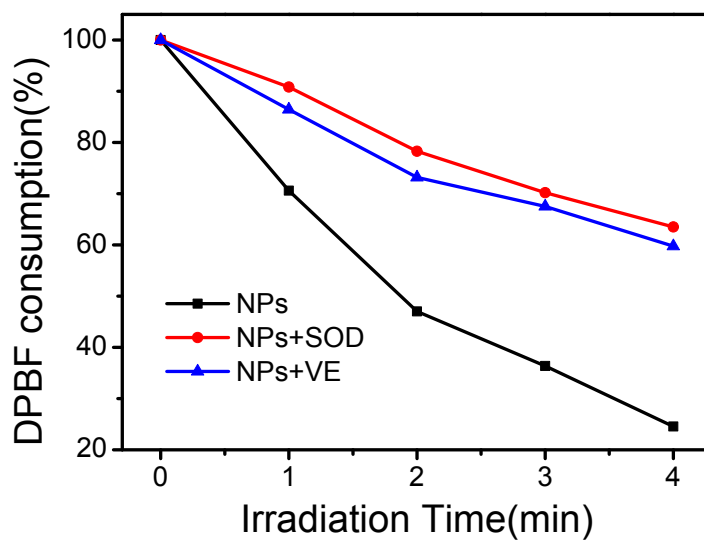

Fig. S11 Comparison of consumption rate of DPBF (10 ppm) over time between NPs (20 mg·L<sup>-1</sup>) alone, NPs with SOD (20 unit/mL) and NPs with VE (20 ppm).

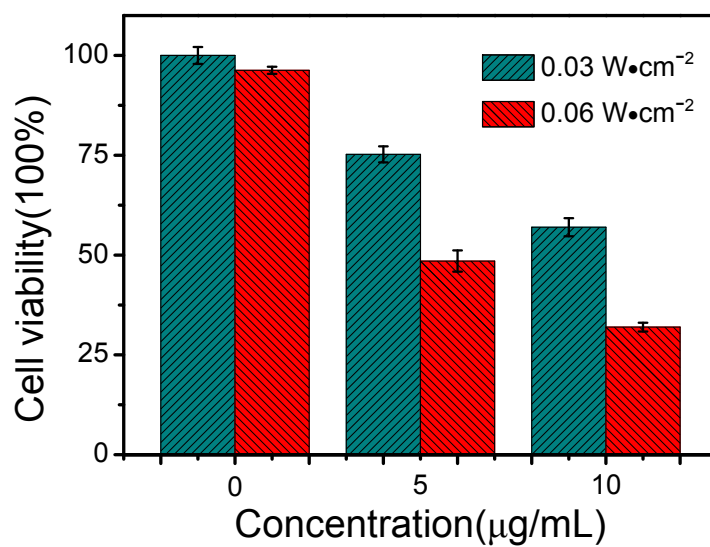

Fig. S12 Viability of HepG2 cells versus different concentrations of NAPP and irradiation power with 405 nm laser.
